# Supplementary material for: Development and Validation of an Optical Sensor-Based Automated Urine Flow Meter for Real-Time Patient Monitoring
Source: MDPI journal article supplement (doi:10.3390/s26030849), 2026-01-28
Supplement: s1 [file sensors-4057651-supplementary.pdf › sensors-4057651-supplementary.pdf]

## Supplementary Information

# Development and Validation of an Optical Sensor-Based Automated Urine Flow Meter for Real-Time Patient Monitoring

Piyush Hota<sup>1,3,4,6</sup>, Adithya Shyamal Pandian<sup>2,3,4,6</sup>, Rodrigo E. Domínguez<sup>3,4,7</sup>, Manni Mo<sup>3,4,6</sup>, Bo Fu<sup>3,4</sup>, Sandra Miranda<sup>3,4</sup>, Pinar Cay Durgan<sup>3,4,6</sup>, Dheeraj Sirganagar<sup>3,6</sup>, Michael Serhan<sup>3,4</sup>, Peter Serhan<sup>3,4</sup>, Kevin Abi Karam<sup>3,4,7</sup>, Naomi M. Gades<sup>5</sup>, Peter Wiktor<sup>3</sup>, Leslie Thomas<sup>4,6\*</sup>, Mary Laura Lind<sup>1,3,4,6\*</sup>, and Erica Forzani<sup>1,2,3,4,6,7\*</sup>

<sup>1</sup> School for Engineering of Matter, Transport & Energy, Ira A. Fulton School of Engineering, Tempe, AZ; phota@asu.edu (P.H.).

<sup>2</sup> School of Electrical, Computer, and Energy Engineering, Ira A. Fulton School of Engineering, Tempe, AZ; ashyamal@asu.edu (A.S.P.).

<sup>3</sup> Center for Bioelectronics and Biosensors, Biodesign Institute, Arizona State University, Tempe, AZ 85287, 1001 S McAllister Ave., Tempe, AZ 85281, U.S.A.; redoming@asu.edu (R.E.D.); mannimo@asu.edu (M.M.); bofu4@asu.edu (B.F.); smiran14@asu.edu (S.M.); pcay1@asu.edu (P.C.D.); dsirgana@asu.edu (D.S.); mserhan@asu.edu (M.S.); pserhan@asu.edu (P.S.); kabikar1@asu.edu (K.A.K.); Peter.Wiktor@asu.edu (P.W.).

<sup>4</sup> Medical Devices and Methods Laboratory, Health Futures Center, Arizona State University, 6161 E. Mayo Blvd., Phoenix, AZ 85054, U.S.A.

<sup>5</sup> Department of Comparative Medicine, Mayo Clinic Arizona, 13400 East Shea Boulevard, Scottsdale, AZ 85259, U.S.A.; gades.naomi@mayo.edu (N.M.G.).

<sup>6</sup> Department of Nephrology and Hypertension, Mayo Clinic Arizona, 5777 E Mayo Boulevard, Phoenix, AZ 85054, U.S.A.

<sup>7</sup> Phoenix Children's Research Institute, Department of Child Health, College of Medicine – Phoenix, University of Arizona, 475 N. 5th St., Phoenix, AZ 85004.

\* Correspondence: eforzani@arizona.edu (E.F.); mllind@asu.edu (M.L.); thomas.leslie@mayo.edu (L.T.).

## Table of Contents

|                                                                     |   |
|---------------------------------------------------------------------|---|
| <b>Table S1.</b> Current Automated UO Monitoring Devices.....       | 3 |
| <b>Figure S1.</b> OCB350L250Z Sensor Module [39] .....              | 4 |
| <b>Figure S2.</b> OCB350L250Z Sensor Output.....                    | 4 |
| <b>Figure S3.</b> Atlas Scientific EZO-PMP Pump [40] .....          | 4 |
| <b>Figure S4.</b> Microcontroller Arduino Mega 2560 [41] .....      | 5 |
| <b>Table S2.</b> Hardware evolution across P-meter prototypes ..... | 5 |

**Table S1.** Current Automated UO Monitoring Devices.

| Device<br>(Company)                    | Technology/Sensing<br>Method                                                                      | Key Features &<br>Resolution                                                                                                  | Status/Validation                                                                                                  |
|----------------------------------------|---------------------------------------------------------------------------------------------------|-------------------------------------------------------------------------------------------------------------------------------|--------------------------------------------------------------------------------------------------------------------|
| kUO Plus [26]<br>(Fize Medical)        | Proprietary in-line sensing; incremental volume detection.                                        | Microliter-level resolution; continuous flow-rate calculation; alarm notifications.                                           | Commercial; minimizes user dependence and positioning errors.                                                      |
| Urinfo 2000 [27]<br>(FlowSense/Baxter) | Custom infrared drop detector; dual-chamber system for precise droplet formation.                 | Measures volumes >1 mL; interfaces with ICU systems.                                                                          | Commercial; validated against manual measurement using a cylinder reference.                                       |
| ClarityRMS [18,32]<br>(RenalSense)     | Thermal method; measures temperature change from thermal energy pulses.                           | Cost-effective; accurate even at low volumes.                                                                                 | Commercial; validated in clinical trials (cardiac surgery patients) using weight measurement as the gold standard. |
| Accuryn<br>(Potrero Medical)<br>[31]   | Active drainage (controlled low vacuum); fused sensors (pressure, acoustic/ultrasound).           | Measures UO rate, intra-abdominal pressure (IAP), and core temperature in real-time.                                          | FDA-approved; undergoing large-scale clinical studies (Accuryn Registry).                                          |
| Sentinel<br>(Serenno Medical)[20]      | Proprietary in-line sensing module.                                                               | Continuous real-time measurement; alerts for early kidney dysfunction detection; 96% accuracy demonstrated in initial trials. | In development/clinical trials.                                                                                    |
| Otero<br>Prototype [17]                | Capacitive sensor in a 90 mL container; magnetic stopper for periodic drainage.                   | Minute-by-minute measurements; Bluetooth data transmission.                                                                   | Laboratory testing only.                                                                                           |
| Art Medical [35]                       | Droplet counting; uses a photosensor and fast-gated camera for individual drop volume estimation. | Software calculates flow rate based on estimated volume and timing.                                                           | Patented, prototype stage.                                                                                         |
| Piyapema<br>Prototype [34]             | Drop generator; NTC thermistor sensing in a drip chamber.                                         | Low-cost disposable sensor; Raspberry Pi control; IoT connectivity for cloud data storage.                                    | Prototype stage.                                                                                                   |
| Padilla<br>Prototype [33]              | Two infrared reflective sensors along the drain tube; measures travel time.                       | Measures UO volume and turbidity; uses an Arduino microcontroller.                                                            | Laboratory testing only (urinary system model).                                                                    |

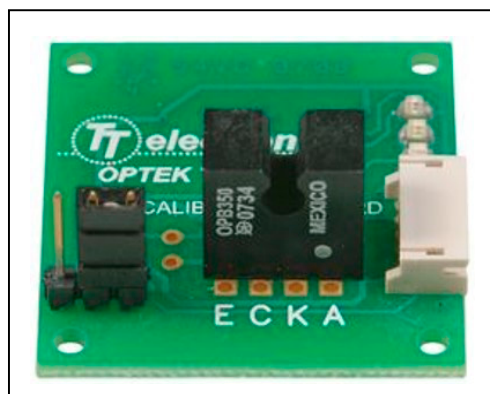

Figure S1. OCB350L250Z Sensor Module [39]

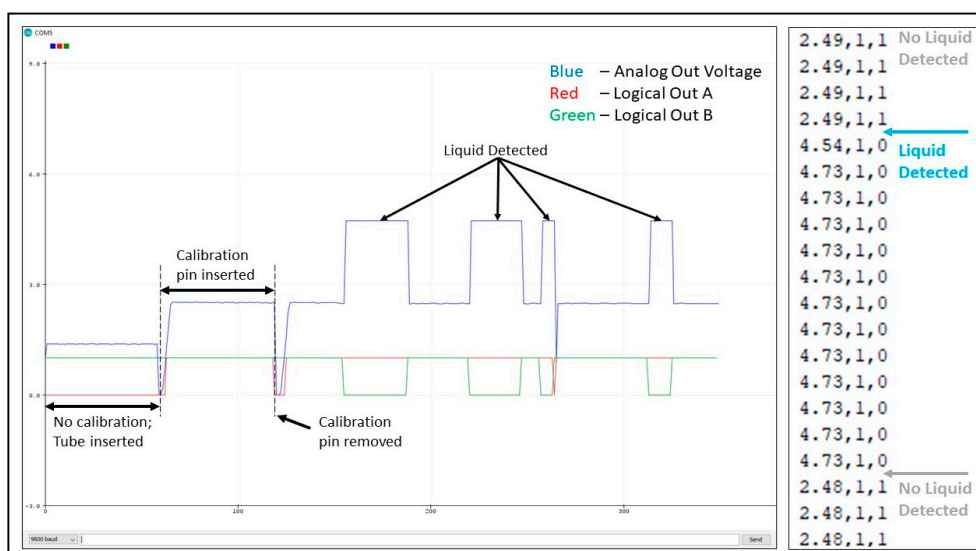

Figure S2. OCB350L250Z Sensor Output.

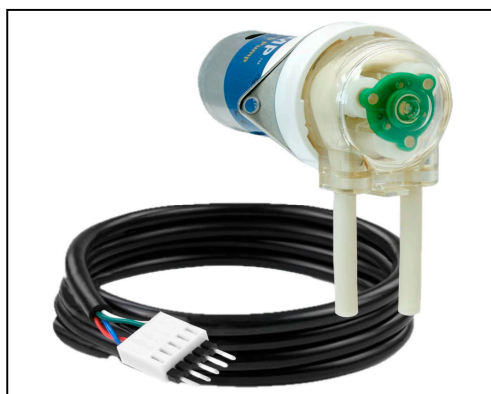

Figure S3. Atlas Scientific EZO-PMP Pump [40]

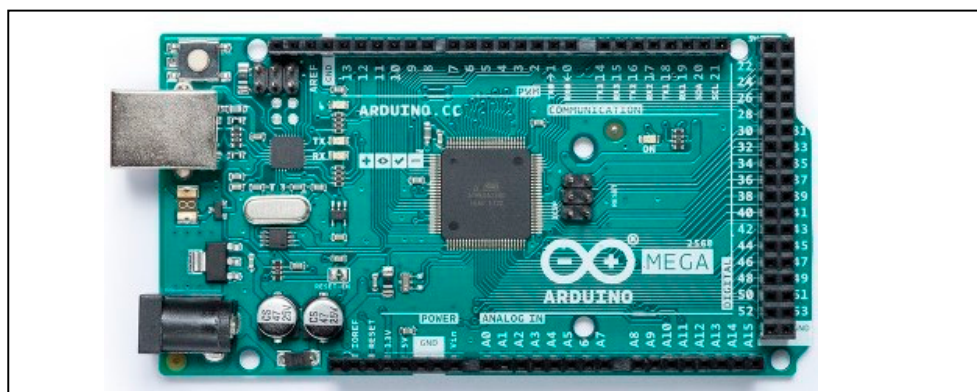

**Figure S4.** Microcontroller Arduino Mega 2560 [41]

**Table S2.** Hardware evolution across P-meter prototypes.

| Feature          | V1                            | V2                            | V3                                  |
|------------------|-------------------------------|-------------------------------|-------------------------------------|
| Micro-controller | Arduino Mega 2560             | Arduino Mega 2560             | Micro-chip<br>PIC 32MX470F512H      |
| Pump             | Atlas Scientific EZO-PMP      | Atlas Scientific EZO-PMP      | Boxer Pumps 9QQ Stepper             |
| Sensors          | TT Electronics<br>OCB350L250Z | TT Electronics<br>OCB350L250Z | TT Electronics<br>OCB350L250Z       |
| Chamber Volume   | 25ml                          | 7.5ml                         | 25ml (optimized)                    |
| Vent/Filter      | Basic Vent                    | Integrated Vent               | Custom Hydrophobic<br>PTFE membrane |
| Housing          | Open bench                    | IP52 enclosure                | Modular /sealed                     |
